# Supplementary material for: Pencil-on-Paper Capacitors for Hand-Drawn RC Circuits and Capacitive Sensing
Source: Hindawi journal article supplement (doi:10.1155/2017/4909327), 2017-01-01
Supplement: f1 [file 4909327.f1.zip]

Archive with 2 entries (2 files):
- exportforcesensor.m4v
- makingpapercap (1).m4v
